# Supplementary material
Source: PubMed Central journal article supplement (PMC8479628)
Supplement: mmc3.pdf [file mmc3.pdf]

EBIOM-D-21-01724 paper

REPLY REPLY ALL FORWARD

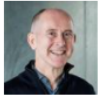

Patrick Augustijns

Tue 8/24/2021 11:42 AM

Mark as read

To:  Rana Abdelnabi;

I, Patrick Augustijns, agree on including my name as co-author in the final version of the **EBIOM-D-21-01724** manuscript

EBIOM-D-21-01724 paper

REPLY REPLY ALL FORWARD

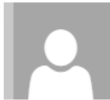

Raf Mols

Fri 8/27/2021 2:56 PM

Mark as read

To:  Rana Abdelnabi;

Me, Raf Mols, agree on including my name as co-authors in the final version of the **EBIOM-D-21-01724** manuscript

Me, Rana Abdelnabi, Agree on including Raf Mols and Patrick Augustins to the final version of EBIOM-D-21-01724.

Yours sincerely,

**Rana Abdelnabi, PhD**

Urgent: EBIOM-D-21-01724

REPLY REPLY ALL FORWARD

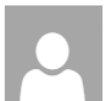

Shi-Yan Caroline Foo

Wed 8/25/2021 10:59 AM

Mark as read

To:  Rana Abdelnabi;

Hello Rana,

Here below:

"Me, Caroline S. Foo, agree on including Raf Mols and Patrick Augustijns as co-authors in the final version of the **EBIOM-D-21-01724** manuscript"

Best,

Caroline

Urgent: EBIOM-D-21-01724

← REPLY   ←← REPLY ALL   → FORWARD   ⋮

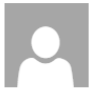

Lana Langendries  
Tue 8/24/2021 10:54 AM

Mark as unread

To:  Rana Abdelnabi;

Congratulations Rana!

Dear Editor,

Me, Lana Langendries agree on including Raf Mols and Patrick Augustijns as co-authors in the final version of the EBIOM-D-21-01724 manuscript.

Best,

Lana Langendries  
PhD student

← REPLY   ←← REPLY ALL   → FORWARD   ⋮

Mark as unread

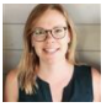

Laura Vangeel  
Tue 8/24/2021 10:45 AM

[Show all 18 recipients](#)

To:  Rana Abdelnabi;  Shi-Yan Caroline Foo;  Xin Zhang;  Lana Langendries;  Dirk Jochmans;  Nguyen Dan Thuc Do;  Suzanne Kaptein; ...

Dear Editor,

Dear Rana

Me, Laura Vangeel, agree on including Raf Mols and Patrick Augustijns as co-authors in the final version of the EBIOM-D-21-01724 manuscript.

Best,

Laura

← REPLY   ←← REPLY ALL   → FORWARD   ⋮

Mark as unread

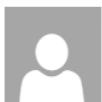

Pang, Juanita <juanita.pang.16@ucl.ac.uk>  
Tue 8/24/2021 10:30 AM

[Show all 18 recipients](#)

To:  Breuer, Judith <j.breuer@ucl.ac.uk>;  Rana Abdelnabi;  Shi-Yan Caroline Foo;  Xin Zhang;  Lana Langendries;  Dirk Jochmans;  Nguyen Dan Thuc Do; ...

Thanks Rana!

Me, Juanita Pang, agree on including Raf Mols and Patrick Augustijns as co-authors in the final version of the **EBIOM-D-21-01724** manuscript

← REPLY   ←← REPLY ALL   → FORWARD   ⋮

Mark as unread

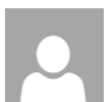

Breuer, Judith <j.breuer@ucl.ac.uk>  
Tue 8/24/2021 10:28 AM

[Show all 18 recipients](#)

To:  Rana Abdelnabi;  Shi-Yan Caroline Foo;  Xin Zhang;  Lana Langendries;  Dirk Jochmans;  Nguyen Dan Thuc Do;  Suzanne Kaptein; ...

Well done Rana and co!

Judith Breuer agrees to including Raf Mols and Patrick Augustijns as co-authors in the final version of the **EBIOM-D-21-01724** manuscript"

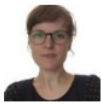

**Lotte Coelmont**  
Tue 8/24/2021 10:12 AM

Mark as unread

To:  Rana Abdelnabi;

Dear Editor, Dear Dr. Abdelnabi,

"Me, Lotte Coelmont, agree on including Raf Mols and Patrick Augustijns as co-authors in the final version of the **EBIOM-D-21-01724** manuscript"

Yours Sincerely,

**Lotte Coelmont**

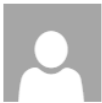

**Birgit Weynand** <birgit.weynand@uzleuven.be>  
Tue 8/24/2021 10:05 AM

Mark as unread

To:  Rana Abdelnabi;

Dear Rana,  
Indeed very good news.

Me, Weynand Birgit, agree on including Raf Mols and Patrick Augustijns as co-authors in the final version of the **EBIOM-D-21-01724** manuscript

Best regards  
Birgit

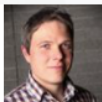

**Kai Dallmeier**  
Tue 8/24/2021 10:01 AM

Mark as unread

[Show all 18 recipients](#)

To:  Rana Abdelnabi;  Shi-Yan Caroline Foo;  Xin Zhang;  Lana Langendries;  Dirk Jochmans;  Nguyen Dan Thuc Do;  Suzanne Kaptein; ...

● You replied on 8/24/2021 10:02 AM.

Dear Editor,  
Dear Rana

Me, Kai Dallmeier, agree on including Raf Mols and Patrick Augustijns as co-authors in the final version of the **EBIOM-D-21-01724** manuscript.

Kind regards

Kai Dallmeier, PhD (Dr. rer. nat.)

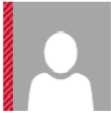

Valentijn Vergote

Tue 8/24/2021 9:47 AM

Mark as unread

d

To:  Rana Abdelnabi;

● You replied on 8/24/2021 9:49 AM.

Congrats Rana!  
Will it be a separate email or this email?  
All the best!

Me, Valentijn Vergote, agree on including Raf Mols and Patrick Augustijns as co-authors in the final version of the **EBIOM-D-21-01724** manuscript

← REPLY   ←← REPLY ALL   → FORWARD   ...

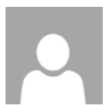

Nguyen Dan Thuc Do

Tue 8/24/2021 9:46 AM

Mark as unread

To:  Rana Abdelnabi;

Hi Rana,

Congratulations!!! You can find my acceptance statement as below.

"I, Thuc Nguyen Dan Do, agree on including Raf Mols and Patrick Augustijns as co-authors in the final version of the **EBIOM-D-21-01724** manuscript"

Cheers,  
Thuc

← REPLY   ←← REPLY ALL   → FORWARD   ...

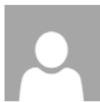

Pieter Leyssen

Tue 8/24/2021 9:40 AM

Mark as unread

To:  Rana Abdelnabi;

● You replied on 8/24/2021 9:41 AM.

Me, Pieter Leyssen, agrees on including Raf Mols and Patrick Augustijns as co-authors in the final version of the **EBIOM-D-21-01724** manuscript

← REPLY   ←← REPLY ALL   → FORWARD   ...

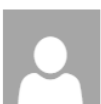

Dirk Jochmans

Tue 8/24/2021 9:39 AM

Mark as unread

To:  Rana Abdelnabi;

Hey Rana

I, Dirk Jochmans, agree on including Raf Mols and Patrick Augustijns as co-authors in the final version of the **EBIOM-D-21-01724** manuscript.

Regards,  
Dirk J

Urgent: EBIOM-D-21-01724

← REPLY   ←← REPLY ALL   → FORWARD   ⋮

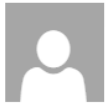

Elisabeth Heylen

Tue 8/24/2021 1:24 PM

Mark as read

Show all 18 recipients

To:  Laura Vangeel;  Rana Abdelnabi;  Shi-Yan Caroline Foo;  Xin Zhang;  Lana Langendries;  Dirk Jochmans;  Nguyen Dan Thuc Do; ...

Dear Editor,  
Dear Rana

Me, Elisabeth Heylen, agree on including Raf Mols and Patrick Augustijns as co-authors in the final version of the EBIOM-D-21-01724 manuscript.

Regards  
Elisabeth

Urgent: EBIOM-D-21-01724

← REPLY   ←← REPLY ALL   → FORWARD   ⋮

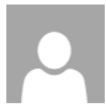

Xin Zhang

Tue 8/24/2021 2:12 PM

Mark as read

Show all 18 recipients

To:  Rana Abdelnabi;  Shi-Yan Caroline Foo;  Lana Langendries;  Dirk Jochmans;  Nguyen Dan Thuc Do;  Suzanne Kaptein;  Laura Vangeel; ...

Dear Editor,  
Dear Rana,

Me, Xin Zhang, agree on including Raf Mols and Patrick Augustijns as co-authors in the final version of the **EBIOM-D-21-01724** manuscript.

Best regards,  
Xin Zhang

← REPLY   ←← REPLY ALL   → FORWARD   ⋮

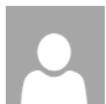

Suzanne Kaptein

Tue 8/24/2021 3:18 PM

Mark as unread

To:  Rana Abdelnabi;

● You replied on 8/24/2021 3:18 PM.

Hi Rana,

See below for confirmation of adding the two co-authors to the final version of the manuscript.

Best,  
Suzanne

Dear Editor,  
Dear Rana

Me, Suzanne J.F. Kaptein, agree on including Raf Mols and Patrick Augustijns as co-authors in the final version of the EBIOM-D-21-01724 manuscript.

Kind regards,  
Suzanne

Urgent: EBIOM-D-21-01724

← REPLY   ←← REPLY ALL   → FORWARD   ⋮

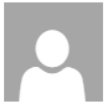

Steven De Jonghe

Wed 8/25/2021 9:25 AM

Mark as read

Show all 18 recipients

To:  Rana Abdelnabi;  Shi-Yan Caroline Foo;  Xin Zhang;  Lana Langendries;  Dirk Jochmans;  Nguyen Dan Thuc Do;  Suzanne Kaptein; ...

Dear Editor,  
Dear Rana,

"Me, Steven De Jonghe, agree on including Raf Mols and Patrick Augustijns as co-authors in the final version of the EBIOM-D-21-01724 manuscript"

Kind regards  
Steven

← REPLY   ←← REPLY ALL   → FORWARD   ⋮

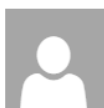

Arnab Chatterjee <achatterjee@scripps.edu>

Tue 8/24/2021 7:23 PM

Mark as unread

Show all 18 recipients

To:  Xin Zhang;  Rana Abdelnabi;  Shi-Yan Caroline Foo;  Lana Langendries;  Dirk Jochmans;  Nguyen Dan Thuc Do;  Suzanne Kaptein; ...

● You replied on 8/24/2021 8:28 PM.

Me, Arnab Chatterjee, agree on including Raf Mols and Patrick Augustijns as co-authors in the final version of the EBIOM-D-21-01724 manuscript

Urgent: EBIOM-D-21-01724

← REPLY   ←← REPLY ALL   → FORWARD   ⋮

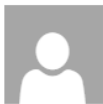

Williams, Rachel <rachel.williams@ucl.ac.uk>

Thu 8/26/2021 4:51 PM

Mark as read

To:  Rana Abdelnabi;

Dear Rana,

Apologies for the delay in replying but I have been away.

I, Rachel Williams, agree on including Raf Mols and Patrick Augustijns as co-authors in the final version of the **EBIOM-D-21-01724** manuscript.

BW,

Rachel
